# Supplementary material for: Congruent evolutionary responses of European steppe biota to late Quaternary climate change: insights from convolutional neural network based demographic modeling
Source: Research Square preprint supplement (doi:10.21203/rs.3.rs-534143/v1), 2021-06-02
Supplement: Supplementary file 1 [file 0b52fb34ab804bf41d97c729.xlsx]

## Sheet: Tabelle1
	Supplementary Table 2. Confusion matrices for the five studied species showing the proportion of simulations predicted for each simulated scenario. The main diagonal, with values presented in bold, represents simulations that were correctly predicted.
	Stenobothrus nigromaculatus
			Predicted Model
			No expansion	Parallel Expansion	Zonal expansion only
	Simulated Model	No expansion	0.8067	0.0007	0.1927
		Parallel Expansion	0.0073	0.9134	0.0793
		Zonal expansion only	0.0738	0.0109	0.9153
	Omocestus petraeus
			Predicted Model
			No expansion	Parallel Expansion	Zonal expansion only
	Simulated Model	No expansion	0.9737	0.0003	0.026
		Parallel Expansion	0.0009	0.9947	0.0044
		Zonal expansion only	0.0479	0.0127	0.9394
	Stipa capillata
			Predicted Model
			No expansion	Parallel Expansion	Zonal expansion only
	Simulated Model	No expansion	0.9974	0.0002	0.0024
		Parallel Expansion	0.0009	0.9885	0.0106
		Zonal expansion only	0.0021	0.1789	0.8191
	Euphorbia segueriana
			Predicted Model
			No expansion	Parallel Expansion	Zonal expansion only
	Simulated Model	No expansion	0.9998	0	0.0002
		Parallel Expansion	0.0008	0.9927	0.0065
		Zonal expansion only	0.0005	0.0088	0.9907
	Plagiolepis taurica
			Predicted Model
			No expansion	Parallel Expansion	Zonal expansion only
	Simulated Model	No expansion	0.7955	0.073	0.1315
		Parallel Expansion	0.0128	0.6325	0.3547
		Zonal expansion only	0.0106	0.1456	0.8438
