# Supplementary material for: Congruent evolutionary responses of European steppe biota to late Quaternary climate change: insights from convolutional neural network based demographic modeling
Source: Research Square preprint supplement (doi:10.21203/rs.3.rs-534143/v1), 2021-06-02
Supplement: Supplementary file 3 [file f8633d2115d11748f10b34dd.xlsx]

## Sheet: Tabelle1
Supplementary Table 4. Prior values and parameter estimates obtained from the preferred demographic model for each species. T1 – time of the splitting event between the two lineages; T2 – time for the first demographic event, associated with the LGP (Last Glacial Period); T3 – time for the third demographic event, in the end of the LGP; n1a – effective population size of the extrazonal lineage pr…
	Stenobothrus nigromaculatus				Omocestus petraeus				Stipa capillata				Euphorbia segueriana				Plagiolepis taurica
Parameter	Prior	Median	95%HPD	Error	Prior	Median	95%HPD	Error	Prior	Median	95%HPD	Error	Prior	Median	95%HPD	Error	Prior	Median	95%HPD	Error
T1 (kya)	110-2400	1233.61	495.9-1942.7	1.12385	110-2400	1329.44	315.6-2366.7	1.08846	110-2400	1608.33	801-2019.1	1.82456	110-2400	912.707	318.3-2246.4	1.24804	110-2400	977.339	294.3-1783.8	2.03484
T2 (kya)	12-110	50.965	27.8-99.4	0.920278	12-110	54.2303	19.8-89.2	0.641373	12-110	69.8137	23.8-102.5	1.20145	12-110	81.9353	15.6-100.8	2.54879	12-110	68.4677	18.7-107.6	0.977042
T3 (kya)	0-12	3.52	0.4-10.1	1.30098	0-12	3.24572	0.4-8.5	1.08259	0-12	6.70721	0.6-10.5	1.72163	0-12	6.12152	3.2-10.8	0.950303	0-12	5.32217	4.1-9.7	0.722998
n1a (k)	10-100	36.5612	24.9-49.1	1.22331	10-200	90.5838	43.3-160.5	1.07595	5-100	25.9409	12-71.6	1.0607	-	-	-	-	-	-	-	-
n1b (k)	10-100	36.7014	29-57.9	1.94671	10-200	124.09	45.7-164.7	1.5704	5-100	30.9212	10.3-61.5	0.970962	20-200	106.157	48.2-130.9	1.08397	50-600	227.917	90.5-427	0.875544
n2a (k)	100-10000	4654.27	891.6-6788.8	1.34881	100-20000	9540.79	2117.6-17728.8	1.00802	50-10000	1378.99	443.4-6435.3	1.21114	-	-	-	-	-	-	-	-
n2b (k)	100-10000	2804.13	795.9-6359.5	1.04287	100-20000	8306.57	2565.2-13738.6	1.08316	50-10000	1448.75	388.2-7804.3	1.26969	200-20000	8280.72	1649.9-17312.3	1.19554	500-60000	9161.4	2337.2-22004.7	1.10775
n3a (k)	20-100	56.7085	33.2-79.6	1.5309	20-200	156.284	54.2-181.5	1.48824	10-100	36.0271	14.5-85.3	0.911306	40-200	126.784	72.4-192.2	1.15131	100-600	333.321	112.5-572.3	0.937896
n3b (k)	4-500	161.291	22.9-229.8	0.77348	4-1000	516.69	117.6-823.9	1.42996	2-500	96.7474	10.3-295.5	1.50871	8-1000	274.112	53.6-566	0.826891	20-3000	586.721	218-2176.1	0.866059
m1_Z-ExZ	0-5	2.0026	0.4-4	1.74765	0-5	2.1215	0.1-4.1	1.25811	0-5	3.3681	1.1-4.6	1.25673	0-5	2.2969	0.2-4.6	0.945598	0-5	2.8483	1.4-4.6	1.66128
m1_ExZ-Z	0-5	1.9632	0.4-4.5	0.688525	0-5	2.8487	0.4-4.7	0.722481	0-5	3.0107	1.2-5	1.22072	0-5	2.6332	0.2-4.5	0.962927	0-5	2.669	0.6-4.9	1.05619
m2_Z-ExZ	0-5	2.0891	0.1-4.9	1.23042	0-5	4.1057	0.2-4.9	1.11288	0-5	1.8493	0.3-4	1.85942	0-5	3.4434	1.3-4.5	0.781087	0-5	1.8885	0.7-4.7	0.777047
m2_ExZ-Z	0-5	2.1631	0.1-3.8	0.801543	0-5	3.6061	0.9-4.8	1.26155	0-5	1.4935	0.4-4.8	1.37043	0-5	2.1638	0.3-4.6	0.869875	0-5	2.848	0.4-4.3	1.38983
