# Supplementary material for: Congruent evolutionary responses of European steppe biota to late Quaternary climate change: insights from convolutional neural network based demographic modeling
Source: Research Square preprint supplement (doi:10.21203/rs.3.rs-534143/v1), 2021-06-02
Supplement: Supplementary file 4 [file cdb247bb16d447dc79f67df1.xlsx]

## Sheet: Euphorbia seguieriana
Ind ID	Pop ID	STRUCTURE	bpp	Stairway Plot	CNN	Latitude	Longitude	Altitude	SRA accession number	Collector
5_1	5	1	0	1	1	41.9117	0.952222	270	SAMN11476567	A. Hilpold & M. Prahmsohler
5_2	5	1	0	1	1	41.9117	0.952222	270	SAMN11476568	A. Hilpold & M. Prahmsohler
5_3	5	1	0	1	1	41.9117	0.952222	270	SAMN11476569	A. Hilpold & M. Prahmsohler
8_1	8	1	0	1	1	42.3914	1.85111	1050	SAMN11476606	A. Hilpold & M. Prahmsohler
8_2	8	1	0	1	1	42.3914	1.85111	1050	SAMN11476607	A. Hilpold & M. Prahmsohler
17_1	17	1	1	1	1	43.8717	3.30111	730	SAMN11476680	B. Frajman
17_2	17	1	0	1	1	43.8717	3.30111	730	SAMN11476681	B. Frajman
17_3	17	1	0	1	1	43.8717	3.30111	730	SAMN11476682	B. Frajman
20_1	20	1	0	1	1	43.5683	4.8286	10	SAMN11476639	A. Hilpold, P. Schönswetter, M. Prahmsohler
20_2	20	1	0	1	1	43.5683	4.8286	10	SAMN11476640	A. Hilpold, P. Schönswetter, M. Prahmsohler
22_1	22	1	0	1	1	44.1742	5.2793	1870	SAMN11476636	A. Hilpold, P. Schönswetter, M. Prahmsohler
22_2	22	1	1	1	1	44.1742	5.2793	1870	SAMN11476637	A. Hilpold, P. Schönswetter, M. Prahmsohler
22_3	22	1	0	1	1	44.1742	5.2793	1870	SAMN11476638	A. Hilpold, P. Schönswetter, M. Prahmsohler
24_1	24	1	0	1	1	43.8133	5.8327	290	SAMN11476676	A. Hilpold, P. Schönswetter, M. Prahmsohler
24_2	24	1	0	1	1	43.8133	5.8327	290	SAMN11476677	A. Hilpold, P. Schönswetter, M. Prahmsohler
24_3	24	1	0	1	1	43.8133	5.8327	290	SAMN11476678	A. Hilpold, P. Schönswetter, M. Prahmsohler
55_1	55	1	0	1	1	45.145	7.12222	520	SAMN11476689	P. Schönswetter
55_2	55	1	0	1	1	45.145	7.12222	520	SAMN11476690	P. Schönswetter
55_3	55	1	1	1	1	45.145	7.12222	520	SAMN11476691	P. Schönswetter
57_1	57	1	1	1	1	45.2807	6.82325	1399	SAMN11476593	E. Trucchi
57_2	57	1	0	1	1	45.2807	6.82325	1399	SAMN11476594	E. Trucchi
57_3	57	1	0	1	1	45.2807	6.82325	1399	SAMN11476595	E. Trucchi
60_1	60	1	1	1	1	45.2514	6.78543	1418	SAMN11476590	E. Trucchi
60_2	60	1	1	1	1	45.2514	6.78543	1418	SAMN11476591	E. Trucchi
60_3	60	1	0	1	1	45.2514	6.78543	1418	SAMN11476592	E. Trucchi
61_1	61	1	0	1	1	45.224	6.74411	1484	SAMN11476587	E. Trucchi
61_2	61	1	0	1	1	45.224	6.74411	1484	SAMN11476588	E. Trucchi
61_3	61	1	0	1	1	45.224	6.74411	1484	SAMN11476589	E. Trucchi
71_1	71	1	0	1	1	45.7664	7.02429	1071	SAMN11476584	E. Trucchi
71_2	71	1	0	1	1	45.7664	7.02429	1071	SAMN11476585	E. Trucchi
71_3	71	1	1	1	1	45.7664	7.02429	1071	SAMN11476683	E. Trucchi
75_1	75	1	0	1	1	45.7002	7.22579	761	SAMN11476684	E. Trucchi
75_2	75	1	0	1	1	45.7002	7.22579	761	SAMN11476685	E. Trucchi
75_3	75	1	0	1	1	45.7002	7.22579	761	SAMN11476686	E. Trucchi
77_1	77	1	0	1	1	45.7596	7.4392	1357	SAMN11476586	E. Trucchi
77_2	77	1	0	1	1	45.7596	7.4392	1357	SAMN11476687	E. Trucchi
77_3	77	1	0	1	1	45.7596	7.4392	1357	SAMN11476688	E. Trucchi
79_1	79	1	0	1	1	46.1019	7.06333	685	SAMN11476576	C. Gilli
79_2	79	1	0	1	1	46.1019	7.06333	685	SAMN11476695	C. Gilli
79_3	79	1	1	1	1	46.1019	7.06333	685	SAMN11476696	C. Gilli
85_1	85	1	0	1	1	46.3047	7.50889	1000	SAMN11476609	A. Hilpold & M. Prahmsohler
85_2	85	1	0	1	1	46.3047	7.50889	1000	SAMN11476610	A. Hilpold & M. Prahmsohler
85_3	85	1	0	1	1	46.3047	7.50889	1000	SAMN11476611	A. Hilpold & M. Prahmsohler
96_1	96	1	1	1	1	46.6124	10.5786	954	SAMN11476556	P. Kirschner
96_2	96	1	0	1	1	46.6124	10.5786	954	SAMN11476557	P. Kirschner
96_3	96	1	0	1	1	46.6124	10.5786	954	SAMN11476558	P. Kirschner
101_1	101	1	0	1	1	46.6278	10.8094	777	SAMN11476573	P. Schönswetter
101_2	101	1	0	1	1	46.6278	10.8094	777	SAMN11476574	P. Schönswetter
101_3	101	1	0	1	1	46.6278	10.8094	777	SAMN11476575	P. Schönswetter
103_1	103	1	1	1	1	46.6224	10.8455	725	SAMN11476697	P. Kirschner
103_2	103	1	0	1	1	46.6224	10.8455	725	SAMN11476698	P. Kirschner
103_3	103	1	0	1	1	46.6224	10.8455	725	SAMN11476699	P. Kirschner
106_1	106	1	0	1	1	46.6486	10.9841	563	SAMN11476599	P. Kirschner
106_2	106	1	0	1	1	46.6486	10.9841	563	SAMN11476600	P. Kirschner
106_3	106	1	0	1	1	46.6486	10.9841	563	SAMN11476601	P. Kirschner
129_1	129	1	0	1	1	46.2311	11.0753	311	SAMN11476643	B. Frajman & P. Schönswetter
129_2	129	1	1	1	1	46.2311	11.0753	311	SAMN11476644	B. Frajman & P. Schönswetter
129_3	129	1	0	1	1	46.2311	11.0753	311	SAMN11476645	B. Frajman & P. Schönswetter
130_1	130	1	0	1	1	45.9483	11.1119	245	SAMN11476646	B. Frajman & P. Schönswetter
130_2	130	1	0	1	1	45.9483	11.1119	245	SAMN11476647	B. Frajman & P. Schönswetter
130_3	130	1	0	1	1	45.9483	11.1119	245	SAMN11476648	B. Frajman & P. Schönswetter
162_1	162	1	0	1	1	48.1056	7.68361	321	SAMN11476633	B. Frajman & P. Kirschner
162_2	162	1	0	1	1	48.1056	7.68361	321	SAMN11476634	B. Frajman & P. Kirschner
162_3	162	1	0	1	1	48.1056	7.68361	321	SAMN11476635	B. Frajman & P. Kirschner
166_1	166	1	0	1	1	50.015	8.20139	130	SAMN11476630	B. Frajman & P. Kirschner
166_2	166	1	0	1	1	50.015	8.20139	130	SAMN11476631	B. Frajman & P. Kirschner
166_3	166	1	1	1	1	50.015	8.20139	130	SAMN11476632	B. Frajman & P. Kirschner
167_1	167	1	0	1	1	49.3522	8.63778	111	SAMN11476673	B. Frajman & P. Kirschner
167_2	167	1	0	1	1	49.3522	8.63778	111	SAMN11476674	B. Frajman & P. Kirschner
167_3	167	1	0	1	1	49.3522	8.63778	111	SAMN11476675	B. Frajman & P. Kirschner
168_1	168	1	0	1	1	49.8702	9.86205	291	SAMN11476641	E. Zaveska
168_2	168	1	0	1	1	49.8702	9.86205	291	SAMN11476642	E. Zaveska
170_1	170	1	0	0	0	51.1822	10.5744	221	SAMN11476670	E.Zaveska
170_2	170	1	0	0	0	51.1822	10.5744	221	SAMN11476671	E.Zaveska
170_3	170	1	0	0	0	51.1822	10.5744	221	SAMN11476672	E.Zaveska
198_1	198	1	1	1	1	49.007	16.9995	229	SAMN11476649	F. Kolar
198_2	198	1	1	1	1	49.007	16.9995	229	SAMN11476650	F. Kolar
198_3	198	1	0	1	1	49.007	16.9995	229	SAMN11476651	F. Kolar
203_1	203	1	1	1	1	48.1244	16.9317	300	SAMN11476667	P. Schönswetter
203_2	203	1	0	1	1	48.1244	16.9317	300	SAMN11476668	P. Schönswetter
203_3	203	1	0	1	1	48.1244	16.9317	300	SAMN11476669	P. Schönswetter
212_1	212	1	0	1	1	47.711	17.677	113	SAMN11476655	P. Kirschner
212_2	212	1	0	1	1	47.711	17.677	113	SAMN11476656	P. Kirschner
212_3	212	1	1	1	1	47.711	17.677	113	SAMN11476657	P. Kirschner
214_1	214	1	0	1	1	46.881	17.6944	129	SAMN11476550	P. Kirschner
214_2	214	1	0	1	1	46.881	17.6944	129	SAMN11476551	P. Kirschner
214_3	214	1	0	1	1	46.881	17.6944	129	SAMN11476552	P. Kirschner
221_1	221	1	0	1	1	47.6614	18.7903	274	SAMN11476664	K. Bardy & M. Kropf
221_2	221	1	0	1	1	47.6614	18.7903	274	SAMN11476665	K. Bardy & M. Kropf
221_3	221	1	0	1	1	47.6614	18.7903	274	SAMN11476666	K. Bardy & M. Kropf
224_1	224	1	0	1	1	46.8829	19.4012	105	SAMN11476658	P. Kirschner
224_2	224	1	1	1	1	46.8829	19.4012	105	SAMN11476659	P. Kirschner
224_3	224	1	1	1	1	46.8829	19.4012	105	SAMN11476660	P. Kirschner
238_1	238	1	0	1	1	45.1316	19.5745	197	SAMN11476553	P. Kirschner
238_2	238	1	0	1	1	45.1316	19.5745	197	SAMN11476554	P. Kirschner
238_3	238	1	1	1	1	45.1316	19.5745	197	SAMN11476555	P. Kirschner
178_1	178	1	0	1	1	51.5228	11.615	100	SAMN11476562	T. Wilhalm & E. Zippel
178_2	178	1	0	1	1	51.5228	11.615	100	SAMN11476563	T. Wilhalm & E. Zippel
178_3	178	1	0	1	1	51.5228	11.615	100	SAMN11476564	T. Wilhalm & E. Zippel
210_1	210	1	0	1	1	47.7772	16.5835	190	SAMN11476559	P. Kirschner
210_2	210	1	0	1	1	47.7772	16.5835	190	SAMN11476560	P. Kirschner
210_3	210	1	0	1	1	47.7772	16.5835	190	SAMN11476561	P. Kirschner
189_1	189	1	0	1	1	48.4036	15.5738	300	SAMN11476565	C. Pachschwöll & R. Hehenberger
189_2	189	1	0	1	1	48.4036	15.5738	300	SAMN11476566	C. Pachschwöll & R. Hehenberger
189_3	189	1	1	1	1	48.4036	15.5738	300	SAMN11476605	C. Pachschwöll & R. Hehenberger
194_1	194	1	0	1	1	49.1086	16.1831	353	SAMN11476577	L. Ekrt
194_2	194	1	1	1	1	49.1086	16.1831	353	SAMN11476578	L. Ekrt
194_3	194	1	1	1	1	49.1086	16.1831	353	SAMN11476579	L. Ekrt
242_1	242	1	0	1	1	44.9908	20.9575	165	SAMN11476661	B. Frajman & P. Schönswetter
242_2	242	1	0	1	1	44.9908	20.9575	165	SAMN11476662	B. Frajman & P. Schönswetter
242_3	242	1	0	1	1	44.9908	20.9575	165	SAMN11476663	B. Frajman & P. Schönswetter
187_1	187	1	0	1	1	50.2134	14.3569	206	SAMN11476544	F. Kolar
187_2	187	1	0	1	1	50.2134	14.3569	206	SAMN11476545	F. Kolar
187_3	187	1	1	1	1	50.2134	14.3569	206	SAMN11476546	F. Kolar
11_1	11	1	1	1	1	42.1661	3.01389	15	SAMN11476612	A. Hilpold & M. Prahmsohler
11_2	11	1	1	1	1	42.1661	3.01389	15	SAMN11476613	A. Hilpold & M. Prahmsohler
11_3	11	1	1	1	1	42.1661	3.01389	15	SAMN11476614	A. Hilpold & M. Prahmsohler
233_1	233	1	0	1	1	46.7911	23.9664	385	SAMN11476602	E. Ruprecht
233_2	233	1	0	1	1	46.7911	23.9664	385	SAMN11476603	E. Ruprecht
233_3	233	1	0	1	1	46.7911	23.9664	385	SAMN11476604	E. Ruprecht
83_2	83	1	0	1	1	46.1722	7.40778	960	SAMN11476693	C. Gilli
83_3	83	1	0	1	1	46.1722	7.40778	960	SAMN11476694	C. Gilli
283_1	283	1	1	1	1	44.7562	28.9356	2	SAMN11476547	P. Kirschner
283_2	283	1	1	1	1	44.7562	28.9356	2	SAMN11476548	P. Kirschner
283_3	283	1	0	1	1	44.7562	28.9356	2	SAMN11476549	P. Kirschner
267_1	267	1	0	1	1	49.3961	26.0831	376	SAMN11476621	E.Zaveska, P. Kirschner
267_2	267	1	1	1	1	49.3961	26.0831	376	SAMN11476622	E.Zaveska, P. Kirschner
267_3	267	1	0	1	1	49.3961	26.0831	376	SAMN11476623	E.Zaveska, P. Kirschner
278_1	278	1	0	1	1	46.6114	30.2972	60	SAMN11476624	B. Frajman & P. Schönswetter
278_2	278	1	0	1	1	46.6114	30.2972	60	SAMN11476625	B. Frajman & P. Schönswetter
278_3	278	1	0	1	1	46.6114	30.2972	60	SAMN11476626	B. Frajman & P. Schönswetter
285_1	285	1	0	1	1	43.6401	28.5719	10	SAMN11476652	P. Kirschner
285_2	285	1	0	1	1	43.6401	28.5719	10	SAMN11476653	P. Kirschner
285_3	285	1	0	1	1	43.6401	28.5719	10	SAMN11476654	P. Kirschner
309_1	309	1	0	1	1	50.3387	57.2653	260	SAMN11476540	A. Hilpold
309_2	309	1	0	1	1	50.3387	57.2653	260	SAMN11476541	A. Hilpold
308_1	308	1	1	1	1	50.1342	57.3003	306	SAMN11476542	A. Hilpold
308_2	308	1	0	1	1	50.1342	57.3003	306	SAMN11476543	A. Hilpold

## Sheet: Omocestus petraeus
Ind ID	Pop ID	STRUCTURE	bpp	Stairway Plot	CNN	Latitude	Longitude	Altitude	SRA accession number	Collector
100_1	100	1	0	1	1	46.6328	10.724	1097	SAMN11465960	P. Kirschner
100_2	100	1	0	0	0	46.6328	10.724	1097	SAMN11465961	P. Kirschner
100_3	100	1	0	0	0	46.6328	10.724	1097	SAMN11465962	P. Kirschner
102_1	102	1	1	1	1	46.6226	10.8454	731	SAMN11466111	P. Kirschner
102_2	102	1	0	0	0	46.6226	10.8454	731	SAMN11466112	P. Kirschner
102_3	102	1	1	1	0	46.6226	10.8454	731	SAMN11466113	P. Kirschner
105_1	105	1	0	0	0	46.6476	10.9732	564	SAMN11466028	P. Kirschner
105_2	105	1	0	0	0	46.6476	10.9732	564	SAMN11466029	P. Kirschner
105_3	105	1	0	0	0	46.6476	10.9732	564	SAMN11466030	P. Kirschner
126_1	126	1	0	0	0	46.5172	11.4976	880	SAMN11465957	A. Hilpold
126_2	126	1	0	0	0	46.5172	11.4976	880	SAMN11465958	A. Hilpold
126_3	126	1	0	0	0	46.5172	11.4976	880	SAMN11465959	A. Hilpold
127_1	127	1	0	0	0	46.3384	11.2913	388	SAMN11466108	P. Kirschner
127_2	127	1	0	0	0	46.3384	11.2913	388	SAMN11466109	P. Kirschner
127_3	127	1	1	1	0	46.3384	11.2913	388	SAMN11466110	P. Kirschner
13_1	13	1	0	0	0	42.4684	2.9123	708	SAMN11466061	A. Hilpold, P. Schönswetter, M. Prahmsohler
13_2	13	1	0	0	0	42.4684	2.9123	708	SAMN11466062	A. Hilpold, P. Schönswetter, M. Prahmsohler
13_3	13	1	0	0	0	42.4684	2.9123	708	SAMN11466063	A. Hilpold, P. Schönswetter, M. Prahmsohler
138_1	138	1	0	0	0	46.0135	12.7291	69	SAMN11466090	P. Kirschner, B. Frajman
138_2	138	1	0	0	0	46.0135	12.7291	69	SAMN11466091	P. Kirschner, B. Frajman
138_3	138	1	1	1	1	46.0135	12.7291	69	SAMN11466092	P. Kirschner, B. Frajman
140_1	140	1	0	0	0	45.8443	13.5182	100	SAMN11466105	B. Frajman & P. Kirschner
140_2	140	1	0	0	0	45.8443	13.5182	100	SAMN11466106	B. Frajman & P. Kirschner
140_3	140	1	1	1	0	45.8443	13.5182	100	SAMN11466107	B. Frajman & P. Kirschner
144_1	144	1	0	0	0	44.773	14.7833	335	SAMN11466034	P. Kirschner
144_2	144	1	0	0	0	44.773	14.7833	335	SAMN11466035	P. Kirschner
144_3	144	1	1	1	1	44.773	14.7833	335	SAMN11466036	P. Kirschner
145_1	145	1	1	1	1	44.2247	16.0673	600	SAMN11466114	P. Kirschner
145_2	145	1	1	1	0	44.2247	16.0673	600	SAMN11466115	P. Kirschner
145_3	145	1	1	1	1	44.2247	16.0673	600	SAMN11466116	P. Kirschner
146_1	146	1	1	1	1	44.8364	9.47769	668	SAMN11466079	B. Frajman & P. Kirschner
146_2	146	1	1	1	0	44.8364	9.47769	668	SAMN11466080	B. Frajman & P. Kirschner
146_3	146	1	0	0	0	44.8364	9.47769	668	SAMN11466081	B. Frajman & P. Kirschner
149_1	149	1	0	0	0	43.0315	13.1171	902	SAMN11466087	B. Frajman & P. Kirschner
149_2	149	1	0	0	0	43.0315	13.1171	902	SAMN11466088	B. Frajman & P. Kirschner
149_3	149	1	0	0	0	43.0315	13.1171	902	SAMN11466089	B. Frajman & P. Kirschner
150_1	150	1	0	0	0	42.9979	13.2388	1393	SAMN11466082	B. Frajman & P. Kirschner
150_2	150	1	0	0	0	42.9979	13.2388	1393	SAMN11466083	B. Frajman & P. Kirschner
151_1	151	1	0	0	0	42.7704	13.1695	1493	SAMN11466084	B. Frajman & P. Kirschner
151_2	151	1	1	1	1	42.7704	13.1695	1493	SAMN11466085	B. Frajman & P. Kirschner
151_3	151	1	1	1	0	42.7704	13.1695	1493	SAMN11466086	B. Frajman & P. Kirschner
153_1	153	1	0	0	0	42.7112	12.7645	981	SAMN11466102	P. Kirschner, B. Frajman
153_2	153	1	0	0	0	42.7112	12.7645	981	SAMN11466103	P. Kirschner, B. Frajman
153_3	153	1	0	0	0	42.7112	12.7645	981	SAMN11466104	P. Kirschner, B. Frajman
154_1	154	1	0	0	0	42.4509	12.9846	1710	SAMN11466099	B. Frajman & P. Kirschner
154_2	154	1	1	1	0	42.4509	12.9846	1710	SAMN11466100	B. Frajman & P. Kirschner
154_3	154	1	0	0	0	42.4509	12.9846	1710	SAMN11466101	B. Frajman & P. Kirschner
158_1	158	1	0	0	0	42.3373	13.5797	1090	SAMN11466096	B. Frajman & P. Kirschner
158_2	158	1	0	0	0	42.3373	13.5797	1090	SAMN11466097	B. Frajman & P. Kirschner
158_3	158	1	0	0	0	42.3373	13.5797	1090	SAMN11466098	B. Frajman & P. Kirschner
16_1	16	1	0	0	0	43.5795	3.6548	287	SAMN11466049	A. Hilpold, P. Schönswetter, M. Prahmsohler
16_2	16	1	0	0	0	43.5795	3.6548	287	SAMN11466050	A. Hilpold, P. Schönswetter, M. Prahmsohler
16_3	16	1	1	1	1	43.5795	3.6548	287	SAMN11466051	A. Hilpold, P. Schönswetter, M. Prahmsohler
161_1	161	1	1	1	1	41.6943	15.7669	635	SAMN11466093	B. Frajman & P. Kirschner
161_2	161	1	0	0	0	41.6943	15.7669	635	SAMN11466094	B. Frajman & P. Kirschner
161_3	161	1	0	0	0	41.6943	15.7669	635	SAMN11466095	B. Frajman & P. Kirschner
19_1	19	1	0	0	0	45.3106	4.6462	584	SAMN11466067	A. Hilpold, P. Schönswetter, M. Prahmsohler
19_2	19	1	0	0	0	45.3106	4.6462	584	SAMN11466068	A. Hilpold, P. Schönswetter, M. Prahmsohler
19_3	19	1	0	0	0	45.3106	4.6462	584	SAMN11466069	A. Hilpold, P. Schönswetter, M. Prahmsohler
195_1	195	1	1	0	0	49.1092	16.1859	374	SAMN11466006	P. Kirschner
195_2	195	1	0	0	0	49.1092	16.1859	374	SAMN11466007	P. Kirschner
195_3	195	1	1	0	1	49.1092	16.1859	374	SAMN11466008	P. Kirschner
207_1	207	1	0	0	0	47.9528	16.7722	122	SAMN11466031	P. Kirschner
207_2	207	1	0	0	0	47.9528	16.7722	122	SAMN11466032	P. Kirschner
207_3	207	1	1	1	0	47.9528	16.7722	122	SAMN11466033	P. Kirschner
21_1	21	1	0	0	0	43.6027	4.97	49	SAMN11466055	A. Hilpold, P. Schönswetter, M. Prahmsohler
21_2	21	1	0	0	0	43.6027	4.97	49	SAMN11466056	A. Hilpold, P. Schönswetter, M. Prahmsohler
21_3	21	1	0	0	0	43.6027	4.97	49	SAMN11466057	A. Hilpold, P. Schönswetter, M. Prahmsohler
216_1	216	1	0	0	0	47.0996	18.0234	225	SAMN11465998	P. Kirschner
216_2	216	1	1	0	1	47.0996	18.0234	225	SAMN11465999	P. Kirschner
216_3	216	1	0	0	0	47.0996	18.0234	225	SAMN11466000	P. Kirschner
23_1	23	1	1	1	0	44.2374	5.4705	844	SAMN11466058	A. Hilpold, P. Schönswetter, M. Prahmsohler
23_2	23	1	0	0	0	44.2374	5.4705	844	SAMN11466059	A. Hilpold, P. Schönswetter, M. Prahmsohler
23_3	23	1	0	0	0	44.2374	5.4705	844	SAMN11466060	A. Hilpold, P. Schönswetter, M. Prahmsohler
240_1	240	1	1	0	0	45.0156	20.9564	148	SAMN11465992	P. Kirschner
240_2	240	1	0	0	0	45.0156	20.9564	148	SAMN11465993	P. Kirschner
240_3	240	1	0	0	0	45.0156	20.9564	148	SAMN11465994	P. Kirschner
25_1	25	1	0	0	0	43.7107	6.511	898	SAMN11466070	A. Hilpold, P. Schönswetter, M. Prahmsohler
25_2	25	1	0	0	0	43.7107	6.511	898	SAMN11466071	A. Hilpold, P. Schönswetter, M. Prahmsohler
25_3	25	1	1	1	1	43.7107	6.511	898	SAMN11466072	A. Hilpold, P. Schönswetter, M. Prahmsohler
253_1	253	1	0	0	0	40.2254	21.5913	836	SAMN11465986	P. Kirschner
253_2	253	1	0	0	0	40.2254	21.5913	836	SAMN11465987	P. Kirschner
253_3	253	1	1	1	1	40.2254	21.5913	836	SAMN11465988	P. Kirschner
256_1	256	1	1	0	0	41.5038	23.314	177	SAMN11465995	P. Kirschner
256_2	256	1	1	0	1	41.5038	23.314	177	SAMN11465996	P. Kirschner
256_3	256	1	0	0	0	41.5038	23.314	177	SAMN11465997	P. Kirschner
258_1	258	1	1	1	1	42.1376	22.9944	599	SAMN11465983	P. Kirschner
258_3	258	1	0	0	0	42.1376	22.9944	599	SAMN11465985	P. Kirschner
27_1	27	1	1	1	1	44.486	6.1922	1165	SAMN11466073	A. Hilpold, P. Schönswetter, M. Prahmsohler
27_2	27	1	0	0	0	44.486	6.1922	1165	SAMN11466074	A. Hilpold, P. Schönswetter, M. Prahmsohler
27_3	27	1	0	0	0	44.486	6.1922	1165	SAMN11466075	A. Hilpold, P. Schönswetter, M. Prahmsohler
282_1	282	1	0	0	0	44.8809	28.8419	50	SAMN11466003	P. Kirschner
282_2	282	1	0	1	0	44.8809	28.8419	50	SAMN11466004	P. Kirschner
282_3	282	1	0	0	0	44.8809	28.8419	50	SAMN11466005	P. Kirschner
284_1	284	1	0	0	0	44.1676	28.4092	21	SAMN11466001	P. Kirschner
284_2	284	1	0	0	0	44.1676	28.4092	21	SAMN11466002	P. Kirschner
287_1	287	1	0	0	0	42.7144	27.8922	134	SAMN11465989	P. Kirschner
287_2	287	1	1	1	1	42.7144	27.8922	134	SAMN11465990	P. Kirschner
287_3	287	1	0	0	0	42.7144	27.8922	134	SAMN11465991	P. Kirschner
292_1	292	1	0	1	0	41.9525	44.1775	591	SAMN11466046	P. Kirschner
292_2	292	1	0	1	0	41.9525	44.1775	591	SAMN11466047	P. Kirschner
298_1	298	1	0	0	0	40.4549	43.8497	1852	SAMN11466043	P. Kirschner
298_2	298	1	0	0	0	40.4549	43.8497	1852	SAMN11466044	P. Kirschner
298_3	298	1	0	0	0	40.4549	43.8497	1852	SAMN11466045	P. Kirschner
299_1	299	1	0	0	0	40.2735	45.2183	1933	SAMN11466024	M. Falch
30_1	30	1	0	0	0	44.6205	6.54391	874	SAMN11465980	E. Trucchi
30_2	30	1	0	0	0	44.6205	6.54391	874	SAMN11465981	E. Trucchi
30_3	30	1	1	1	1	44.6205	6.54391	874	SAMN11465982	E. Trucchi
300_1	300	1	0	0	0	40.274	45.2209	1923	SAMN11466037	P. Kirschner
300_2	300	1	0	0	0	40.274	45.2209	1923	SAMN11466038	P. Kirschner
300_3	300	1	0	0	0	40.274	45.2209	1923	SAMN11466039	P. Kirschner
304_1	304	1	0	1	0	39.5218	46.0746	1655	SAMN11466040	P. Kirschner
304_2	304	1	0	1	0	39.5218	46.0746	1655	SAMN11466041	P. Kirschner
304_3	304	1	0	0	0	39.5218	46.0746	1655	SAMN11466042	P. Kirschner
308_1	308	1	0	0	0	50.1342	57.3003	306	SAMN11466012	A. Hilpold
308_2	308	1	0	1	0	50.1342	57.3003	306	SAMN11466013	A. Hilpold
308_3	308	1	0	0	0	50.1342	57.3003	306	SAMN11466014	A. Hilpold
31_1	31	1	0	0	0	44.6713	6.62859	1036	SAMN11465974	E. Trucchi
31_2	31	1	0	0	0	44.6713	6.62859	1036	SAMN11465975	E. Trucchi
31_3	31	1	0	0	0	44.6713	6.62859	1036	SAMN11465976	E. Trucchi
311_1	311	1	0	0	0	50.6403	57.7786	306	SAMN11466009	A. Hilpold
311_2	311	1	0	0	0	50.6403	57.7786	306	SAMN11466010	A. Hilpold
311_3	311	1	0	0	0	50.6403	57.7786	306	SAMN11466011	A. Hilpold
316_1	316	1	0	0	0	44.2206	77.7053	945	SAMN11466021	A. Hilpold
316_2	316	1	0	0	0	44.2206	77.7053	945	SAMN11466022	A. Hilpold
316_3	316	1	0	0	0	44.2206	77.7053	945	SAMN11466023	A. Hilpold
317_1	317	1	0	0	0	44.2919	78.188	1083	SAMN11466015	A. Hilpold
317_2	317	1	0	0	0	44.2919	78.188	1083	SAMN11466016	A. Hilpold
317_3	317	1	0	0	0	44.2919	78.188	1083	SAMN11466017	A. Hilpold
318_1	318	1	0	1	0	43.4558	78.6501	1095	SAMN11466018	A. Hilpold
318_2	318	1	0	0	0	43.4558	78.6501	1095	SAMN11466019	A. Hilpold
318_3	318	1	0	0	0	43.4558	78.6501	1095	SAMN11466020	A. Hilpold
40_1	40	1	0	0	0	44.7405	6.5724	1116	SAMN11466064	A. Hilpold, P. Schönswetter, M. Prahmsohler
40_2	40	1	1	1	1	44.7405	6.5724	1116	SAMN11466065	A. Hilpold, P. Schönswetter, M. Prahmsohler
40_3	40	1	1	1	0	44.7405	6.5724	1116	SAMN11466066	A. Hilpold, P. Schönswetter, M. Prahmsohler
42_1	42	1	0	0	0	44.8146	6.5674	1166	SAMN11465969	E. Trucchi
42_2	42	1	0	0	0	44.8146	6.5674	1166	SAMN11465970	E. Trucchi
48_1	48	1	0	0	0	45.0428	6.8112	1099	SAMN11466052	A. Hilpold, P. Schönswetter, M. Prahmsohler
48_2	48	1	0	0	0	45.0428	6.8112	1099	SAMN11466053
48_3	48	1	0	0	0	45.0428	6.8112	1099	SAMN11466054
6_1	6	1	0	0	0	42.3764	1.8088	1179	SAMN11466048
71_1	71	1	0	0	0	45.7664	7.02429	1071	SAMN11465966
71_2	71	1	0	0	0	45.7664	7.02429	1071	SAMN11465967
71_3	71	1	0	0	0	45.7664	7.02429	1071	SAMN11465968
74_1	74	1	0	0	0	45.6911	7.20454	1024	SAMN11465971
74_2	74	1	1	1	0	45.6911	7.20454	1024	SAMN11465972
74_3	74	1	0	0	0	45.6911	7.20454	1024	SAMN11465973
77_1	77	1	0	0	0	45.7596	7.4392	1357	SAMN11465963
77_3	77	1	0	0	0	45.7596	7.4392	1357	SAMN11465965
78_1	78	1	0	0	0	45.7402	7.68391	1180	SAMN11465977
78_2	78	1	0	0	0	45.7402	7.68391	1180	SAMN11465978
78_3	78	1	0	0	0	45.7402	7.68391	1180	SAMN11465979
92_1	92	1	0	0	0	46.6792	10.5598	1059	SAMN11466025
92_2	92	1	0	0	0	46.6792	10.5598	1059	SAMN11466026
92_3	92	1	0	0	0	46.6792	10.5598	1059	SAMN11466027
94_1	94	1	0	0	0	46.6792	10.5598	1062	SAMN11466076
94_2	94	1	0	0	0	46.6792	10.5598	1062	SAMN11466077
94_3	94	1	0	0	0	46.6792	10.5598	1062	SAMN11466078

## Sheet: Plagiolepis taurica
Ind ID	Pop ID	STRUCTURE	bpp	Stairway Plot	CNN	Latitude	Longitude	Altitude	SRA accession number	Collector
1_1	1	1	0	0	0	46.322	7.568	583	SAMN11465743	E. Trucchi
1_2	1	1	1	1	1	46.322	7.568	583	SAMN11465744	E. Trucchi
1_3	1	1	0	1	0	46.322	7.568	583	SAMN11465745	E. Trucchi
10_1	10	1	0	0	0	45.688	7.18	938	SAMN11465738	E. Trucchi
10_2	10	1	1	1	1	45.688	7.18	938	SAMN11465739	E. Trucchi
10_3	10	1	0	1	0	45.688	7.18	938	SAMN11465740	E. Trucchi
105_1	105	1	1	0	1	47.938	16.718	178	SAMN11465741	P. Kirschner
105_2	105	1	0	0	0	47.938	16.718	178	SAMN11465742	P. Kirschner
120_1	120	1	0	1	0	43.456	78.65	1095	SAMN11465746	A. Hilpold
120_2	120	1	0	1	0	43.456	78.65	1095	SAMN11465747	A. Hilpold
127_1	127	1	0	0	0	50.359	57.355	259	SAMN11465748	A. Hilpold
127_2	127	1	0	0	0	50.359	57.355	259	SAMN11465749	A. Hilpold
135_1	135	1	0	0	0	43.319	78.931	1410	SAMN11465750	A. Hilpold
135_2	135	1	0	0	0	43.319	78.931	1410	SAMN11465751	A. Hilpold
14_1	14	1	0	1	0	45.76	7.439	1357	SAMN11465752	E. Trucchi
14_2	14	1	0	1	0	45.76	7.439	1357	SAMN11465753	E. Trucchi
14_3	14	1	0	0	0	45.76	7.439	1357	SAMN11465754	E. Trucchi
143_1	143	1	0	0	0	48.604	20.264	248	SAMN11465755	E. Zaveska
145_1	145	1	0	1	0	46.641	10.621	1385	SAMN11465756	Schlick-Steiner B.C., Florian Steiner, P. Kirschner
145_2	145	1	0	0	0	46.641	10.621	1385	SAMN11465757	Schlick-Steiner B.C., Florian Steiner, P. Kirschner
15_1	15	1	0	0	0	45.74	7.684	1180	SAMN11465758	E. Trucchi
159_1	159	1	1	1	1	46.627	10.689	922	SAMN11465759	P. Kirschner
159_2	159	1	0	1	0	46.627	10.689	922	SAMN11465760	P. Kirschner
159_3	159	1	0	0	0	46.627	10.689	922	SAMN11465761	P. Kirschner
160_1	160	1	0	1	0	49.87	9.862	291	SAMN11465762	E. Zaveska
160_2	160	1	0	1	0	49.87	9.862	291	SAMN11465763	E. Zaveska
161_1	161	1	0	0	0	45.664	14.219	537	SAMN11465764	P. Kirschner
161_2	161	1	1	1	1	45.664	14.219	537	SAMN11465765	P. Kirschner
161_3	161	1	0	0	0	45.664	14.219	537	SAMN11465766	P. Kirschner
162_1	162	1	1	1	1	51.639	11.751	89	SAMN11465767	E. Zaveska
162_2	162	1	0	0	0	51.639	11.751	89	SAMN11465768	E. Zaveska
162_3	162	1	0	1	1	51.639	11.751	89	SAMN11465769	E. Zaveska
169_1	169	1	0	0	0	41.498	45.289	672	SAMN11465770	P. Kirschner
172_1	172	1	0	0	0	39.505	46.326	1657	SAMN11465771	P. Kirschner
172_2	172	1	0	0	0	39.505	46.326	1657	SAMN11465772	P. Kirschner
172_3	172	1	0	0	0	39.505	46.326	1657	SAMN11465773	P. Kirschner
174_1	174	1	0	0	0	40.455	43.85	1852	SAMN11465774	P. Kirschner
174_2	174	1	0	0	0	40.455	43.85	1852	SAMN11465775	P. Kirschner
174_3	174	1	0	0	0	40.455	43.85	1852	SAMN11465776	P. Kirschner
175_1	175	1	0	0	0	41.868	43.41	824	SAMN11465777	P. Kirschner
175_2	175	1	0	0	0	41.868	43.41	824	SAMN11465778	P. Kirschner
178_1	178	1	0	0	0	48.475	27.805	196	SAMN11465779	P. Kirschner & E. Zaveska
178_2	178	1	0	0	0	48.475	27.805	196	SAMN11465780	P. Kirschner & E. Zaveska
178_3	178	1	0	0	0	48.475	27.805	196	SAMN11465781	P. Kirschner & E. Zaveska
179_1	179	1	0	0	0	47.454	29.338	88	SAMN11465782	P. Kirschner & E. Zaveska
179_2	179	1	0	1	0	47.454	29.338	88	SAMN11465783	P. Kirschner & E. Zaveska
179_3	179	1	0	1	0	47.454	29.338	88	SAMN11465784	P. Kirschner & E. Zaveska
18_1	18	1	0	0	0	45.048	6.787	1123	SAMN11465788	E. Trucchi
18_2	18	1	1	1	1	45.048	6.787	1123	SAMN11465789	E. Trucchi
18_3	18	1	0	0	0	45.048	6.787	1123	SAMN11465790	E. Trucchi
181_1	181	1	0	1	0	48.469	28.455	226	SAMN11465785	P. Kirschner & E. Zaveska
181_2	181	1	0	1	0	48.469	28.455	226	SAMN11465786	P. Kirschner & E. Zaveska
181_3	181	1	0	0	0	48.469	28.455	226	SAMN11465787	P. Kirschner & E. Zaveska
182_1	182	1	1	1	1	51.372	11.055	208	SAMN11465791	E. Zaveska
182_2	182	1	0	1	0	51.372	11.055	208	SAMN11465792	E. Zaveska
183_1	183	1	0	0	0	46.532	14.1	485	SAMN11465793	Birgit Schlick-Steiner
183_2	183	1	0	0	0	46.532	14.1	485	SAMN11465794	Birgit Schlick-Steiner
183_3	183	1	0	0	0	46.532	14.1	485	SAMN11465795	Birgit Schlick-Steiner
184_1	184	1	1	0	1	45.988	14.402	310	SAMN11465796	G. Bracko
184_2	184	1	0	1	1	45.988	14.402	310	SAMN11465797	G. Bracko
185_1	185	1	0	0	0	46.051	14.41	295	SAMN11465798	G. Bracko
187_1	187	1	0	0	0	49.807	7.943	184	SAMN11465799	P. Kirschner
187_2	187	1	0	0	0	49.807	7.943	184	SAMN11465800	P. Kirschner
187_3	187	1	0	0	0	49.807	7.943	184	SAMN11465801	P. Kirschner
27_1	27	1	1	1	1	45.217	6.702	1234	SAMN11465802	E. Trucchi
27_2	27	1	0	1	0	45.217	6.702	1234	SAMN11465803	E. Trucchi
27_3	27	1	0	1	1	45.217	6.702	1234	SAMN11465804	E. Trucchi
28_1	28	1	0	0	0	45.206	6.606	1071	SAMN11465805	E. Trucchi
28_2	28	1	0	0	0	45.206	6.606	1071	SAMN11465806	E. Trucchi
28_3	28	1	1	1	1	45.206	6.606	1071	SAMN11465807	E. Trucchi
29_1	29	1	0	0	0	45.232	6.458	798	SAMN11465808	E. Trucchi
29_2	29	1	0	0	0	45.232	6.458	798	SAMN11465809	E. Trucchi
30_1	30	1	0	0	0	45.556	6.631	768	SAMN11465810	E. Trucchi
30_2	30	1	1	1	1	45.556	6.631	768	SAMN11465811	E. Trucchi
30_3	30	1	1	1	1	45.556	6.631	768	SAMN11465812	E. Trucchi
34_1	34	1	0	0	0	45.574	6.715	915	SAMN11465813	E. Trucchi
34_2	34	1	0	0	0	45.574	6.715	915	SAMN11465814	E. Trucchi
34_3	34	1	0	1	0	45.574	6.715	915	SAMN11465815	E. Trucchi
38_1	38	1	0	1	1	44.864	6.589	1260	SAMN11465816	E. Trucchi
38_2	38	1	0	0	0	44.864	6.589	1260	SAMN11465817	E. Trucchi
38_3	38	1	1	1	1	44.864	6.589	1260	SAMN11465818	E. Trucchi
397_1	397	1	0	0	0	42.316	13.557	839	SAMN11465819	P. Kirschner, B. Frajman
397_2	397	1	0	0	0	42.316	13.557	839	SAMN11465820	P. Kirschner, B. Frajman
397_3	397	1	1	1	1	42.316	13.557	839	SAMN11465821	P. Kirschner, B. Frajman
398_1	398	1	0	0	0	42.058	14.27	628	SAMN11465822	P. Kirschner, B. Frajman
398_2	398	1	1	1	1	42.058	14.27	628	SAMN11465823	P. Kirschner, B. Frajman
4_1	4	1	0	1	0	46.168	7.238	1040	SAMN11465832	E. Trucchi
4_2	4	1	0	1	0	46.168	7.238	1040	SAMN11465835	E. Trucchi
4_3	4	1	0	1	0	46.168	7.238	1040	SAMN11465836	E. Trucchi
40_1	40	1	0	1	0	44.671	6.629	1036	SAMN11465825	E. Trucchi
40_2	40	1	1	1	1	44.671	6.629	1036	SAMN11465826	E. Trucchi
40_3	40	1	0	0	0	44.671	6.629	1036	SAMN11465827	E. Trucchi
401_1	401	1	1	0	1	46.013	12.729	69	SAMN11465824	P. Kirschner, B. Frajman
403_1	403	1	1	1	1	44.237	5.471	844	SAMN11465828	A. Hilpold, P. Schönswetter, M. Prahmsohler
41_1	41	1	1	1	1	44.621	6.544	874	SAMN11465829	E. Trucchi
41_2	41	1	0	1	1	44.621	6.544	874	SAMN11465830	E. Trucchi
41_3	41	1	0	1	1	44.621	6.544	874	SAMN11465831	E. Trucchi
420_1	420	1	0	0	0	48.929	11.349	441	SAMN11465833	E. Zaveska
420_2	420	1	0	0	0	48.929	11.349	441	SAMN11465834	E. Zaveska
436_1	436	1	1	1	1	48.396	15.524	256	SAMN11465837	E. Zaveska
436_2	436	1	0	1	1	48.396	15.524	256	SAMN11465838	E. Zaveska
436_3	436	1	0	0	0	48.396	15.524	256	SAMN11465839	E. Zaveska
44_1	44	1	1	1	1	43.807	7.454	598	SAMN11465842	E. Trucchi
441_1	441	1	0	0	0	43.625	3.36	275	SAMN11465840	R. Blatrix
441_2	441	1	0	1	0	43.625	3.36	275	SAMN11465841	R. Blatrix
444_1	444	1	0	0	0	44.225	16.067	600	SAMN11465843	P. Kirschner
444_2	444	1	1	1	1	44.225	16.067	600	SAMN11465844	P. Kirschner
444_3	444	1	0	0	1	44.225	16.067	600	SAMN11465845	P. Kirschner
446_1	446	1	0	0	0	42.643	3.03274	1	SAMN11465846	C. Lebas
446_2	446	1	0	1	0	42.643	3.03274	1	SAMN11465847	C. Lebas
446_3	446	1	0	0	0	42.643	3.03274	1	SAMN11465848	C. Lebas
54_1	54	1	0	0	0	40.225	21.591	836	SAMN11465849	P. Kirschner
55_1	55	1	1	1	1	40.795	21.734	594	SAMN11465850	P. Kirschner
55_2	55	1	0	0	0	40.795	21.734	594	SAMN11465851	P. Kirschner
57_1	57	1	0	0	0	41.183	22.718	215	SAMN11465852	P. Kirschner
57_2	57	1	0	0	0	41.183	22.718	215	SAMN11465853	P. Kirschner
57_3	57	1	0	0	0	41.183	22.718	215	SAMN11465854	P. Kirschner
61_1	61	1	0	0	0	42.125	22.994	427	SAMN11465855	P. Kirschner
61_2	61	1	0	0	0	42.125	22.994	427	SAMN11465856	P. Kirschner
61_3	61	1	1	1	1	42.125	22.994	427	SAMN11465857	P. Kirschner
64_1	64	1	0	0	0	43.207	27.709	75	SAMN11465858	P. Kirschner
67_1	67	1	0	1	0	44.168	28.409	21	SAMN11465859	P. Kirschner
79_1	79	1	1	0	1	47.468	18.945	247	SAMN11465860	P. Kirschner
79_2	79	1	0	0	0	47.468	18.945	247	SAMN11465861	P. Kirschner
79_3	79	1	0	0	1	47.468	18.945	247	SAMN11465862	P. Kirschner
80_1	80	1	1	0	1	47.789	19.966	269	SAMN11465863	P. Kirschner
80_2	80	1	0	1	1	47.789	19.966	269	SAMN11465864	P. Kirschner
83_1	83	1	0	0	0	46.966	17.863	218	SAMN11465865	P. Kirschner
83_2	83	1	0	0	0	46.966	17.863	218	SAMN11465866	P. Kirschner
83_3	83	1	1	0	1	46.966	17.863	218	SAMN11465867	P. Kirschner
88_1	88	1	1	1	1	45.132	19.574	197	SAMN11465868	P. Kirschner
88_2	88	1	1	0	1	45.132	19.574	197	SAMN11465869	P. Kirschner
88_3	88	1	0	1	1	45.132	19.574	197	SAMN11465870	P. Kirschner
9_1	9	1	0	1	0	45.759	7.056	961	SAMN11465871	E. Trucchi
9_2	9	1	0	0	0	45.759	7.056	961	SAMN11465872	E. Trucchi
9_3	9	1	0	1	0	45.759	7.056	961	SAMN11465873	E. Trucchi
92_1	92	1	1	0	1	49.109	16.186	374	SAMN11465874	P. Kirschner
92_2	92	1	0	0	1	49.109	16.186	374	SAMN11465875	P. Kirschner
92_3	92	1	1	1	1	49.109	16.186	374	SAMN11465876	P. Kirschner
94_1	94	1	1	1	1	46.648	10.973	564	SAMN11465877	P. Kirschner
94_2	94	1	0	0	0	46.648	10.973	564	SAMN11465878	P. Kirschner
94_3	94	1	0	0	0	46.648	10.973	564	SAMN11465879	P. Kirschner
97_1	97	1	0	0	0	46.633	10.724	1097	SAMN11465880	P. Kirschner

## Sheet: Stenobothrus nigromaculatus
Ind ID	Pop ID	STRUCTURE	bpp	Stairway Plot	CNN	Latitude	Longitude	Altitude	SRA accession number	Collector
100_1	100	1	0	0	0	46.6328	10.724	1097	SAMN11466169	P. Kirschner
100_2	100	1	0	0	0	46.6328	10.724	1097	SAMN11466170	P. Kirschner
100_3	100	1	0	0	0	46.6328	10.724	1097	SAMN11466172	P. Kirschner
120_1	120	1	0	0	0	47.4465	10.6342	925	SAMN11466220	P. Kirschner
120_2	120	1	0	0	0	47.4465	10.6342	925	SAMN11466221	P. Kirschner
120_3	120	1	0	0	0	47.4465	10.6342	925	SAMN11466222	P. Kirschner
141_1	141	1	0	0	0	45.7186	14.0196	552	SAMN11466211	B. Frajman & P. Kirschner
141_2	141	1	1	1	1	45.7186	14.0196	552	SAMN11466212	B. Frajman & P. Kirschner
141_3	141	1	1	1	0	45.7186	14.0196	552	SAMN11466213	B. Frajman & P. Kirschner
142_1	142	1	0	0	0	45.2659	14.1839	833	SAMN11466173	P. Kirschner
142_2	142	1	0	0	0	45.2659	14.1839	833	SAMN11466174	P. Kirschner
154_1	154	1	1	1	1	42.4509	12.9846	1710	SAMN11466214	B. Frajman & P. Kirschner
154_2	154	1	0	0	0	42.4509	12.9846	1710	SAMN11466215	B. Frajman & P. Kirschner
154_3	154	1	1	1	1	42.4509	12.9846	1710	SAMN11466216	B. Frajman & P. Kirschner
156_1	156	1	0	0	0	42.4421	13.5838	1831	SAMN11466217	B. Frajman & P. Kirschner
156_2	156	1	0	0	0	42.4421	13.5838	1831	SAMN11466218	B. Frajman & P. Kirschner
156_3	156	1	0	0	0	42.4421	13.5838	1831	SAMN11466219	B. Frajman & P. Kirschner
164_1	164	1	0	0	0	49.817	7.83526	294	SAMN11466185	P. Kirschner
164_2	164	1	1	1	1	49.817	7.83526	294	SAMN11466186	P. Kirschner
164_3	164	1	1	1	1	49.817	7.83526	294	SAMN11466187	P. Kirschner
169_1	169	1	1	1	0	48.9291	11.349	441	SAMN11466205	E. Zaveska
169_2	169	1	0	0	0	48.9291	11.349	441	SAMN11466206	E. Zaveska
169_3	169	1	0	0	0	48.9291	11.349	441	SAMN11466207	E. Zaveska
172_1	172	1	0	0	0	51.3561	11.1016	133	SAMN11466208	E. Zaveska
172_2	172	1	0	0	0	51.3561	11.1016	133	SAMN11466209	E. Zaveska
172_3	172	1	0	0	0	51.3561	11.1016	133	SAMN11466210	E. Zaveska
18_1	18	1	1	1	1	44.5525	4.019	1128	SAMN11466197	A. Hilpold, P. Schönswetter, M. Prahmsohler
18_2	18	1	0	0	0	44.5525	4.019	1128	SAMN11466198	A. Hilpold, P. Schönswetter, M. Prahmsohler
188_1	188	1	0	0	0	48.3959	15.5244	256	SAMN11466223	E. Zaveska
188_2	188	1	0	0	0	48.3959	15.5244	256	SAMN11466224	E. Zaveska
188_3	188	1	0	0	0	48.3959	15.5244	256	SAMN11466225	E. Zaveska
195_2	195	1	0	0	0	49.1092	16.1859	374	SAMN11466123	P. Kirschner
195_3	195	1	0	0	0	49.1092	16.1859	374	SAMN11466124	P. Kirschner
207_1	207	1	0	0	0	47.9528	16.7722	122	SAMN11466171	P. Kirschner
215_1	215	1	0	0	0	46.9663	17.8626	218	SAMN11466125	P. Kirschner
215_2	215	1	0	0	0	46.9663	17.8626	218	SAMN11466126	P. Kirschner
215_3	215	1	0	0	0	46.9663	17.8626	218	SAMN11466127	P. Kirschner
232_1	232	1	0	0	0	46.8449	23.7344	414	SAMN11466131	P. Kirschner
260_1	260	1	0	0	0	42.7261	24.3392	981	SAMN11466128	P. Kirschner
260_2	260	1	0	0	0	42.7261	24.3392	981	SAMN11466129	P. Kirschner
260_3	260	1	0	0	0	42.7261	24.3392	981	SAMN11466130	P. Kirschner
269_1	269	1	0	0	0	48.4748	27.8048	196	SAMN11466176	P. Kirschner & E. Zaveska
269_2	269	1	0	0	0	48.4748	27.8048	196	SAMN11466177	P. Kirschner & E. Zaveska
269_3	269	1	0	0	0	48.4748	27.8048	196	SAMN11466178	P. Kirschner & E. Zaveska
270_1	270	1	0	0	0	48.4686	28.4554	226	SAMN11466182	P. Kirschner & E. Zaveska
270_2	270	1	0	0	0	48.4686	28.4554	226	SAMN11466183	P. Kirschner & E. Zaveska
270_3	270	1	0	0	0	48.4686	28.4554	226	SAMN11466184	P. Kirschner & E. Zaveska
277_2	277	1	0	0	0	46.7674	29.2525	123	SAMN11466180	P. Kirschner & E. Zaveska
277_3	277	1	0	0	0	46.7674	29.2525	123	SAMN11466181	P. Kirschner & E. Zaveska
310_1	310	1	1	1	0	50.3592	57.3547	259	SAMN11466121	A. Hilpold
35_1	35	1	1	1	1	44.7587	6.7993	1371	SAMN11466199	A. Hilpold, P. Schönswetter, M. Prahmsohler
42_1	42	1	0	0	0	44.8146	6.5674	1166	SAMN11466146	E. Trucchi
42_2	42	1	0	0	0	44.8146	6.5674	1166	SAMN11466147	E. Trucchi
42_3	42	1	0	0	0	44.8146	6.5674	1166	SAMN11466142	E. Trucchi
44_1	44	1	1	1	1	44.905	6.656	1351	SAMN11466194	A. Hilpold, P. Schönswetter, M. Prahmsohler
44_2	44	1	1	1	1	44.905	6.656	1351	SAMN11466195	A. Hilpold, P. Schönswetter, M. Prahmsohler
44_3	44	1	1	1	1	44.905	6.656	1351	SAMN11466196	A. Hilpold, P. Schönswetter, M. Prahmsohler
47_1	47	1	0	0	0	45.0477	6.78738	1123	SAMN11466154	E. Trucchi
47_2	47	1	0	0	0	45.0477	6.78738	1123	SAMN11466155	E. Trucchi
47_3	47	1	0	0	0	45.0477	6.78738	1123	SAMN11466156	E. Trucchi
48_1	48	1	1	1	1	45.0428	6.8112	1099	SAMN11466188	A. Hilpold, P. Schönswetter, M. Prahmsohler
48_2	48	1	1	1	1	45.0428	6.8112	1099	SAMN11466189	A. Hilpold, P. Schönswetter, M. Prahmsohler
48_3	48	1	0	0	0	45.0428	6.8112	1099	SAMN11466190	A. Hilpold, P. Schönswetter, M. Prahmsohler
50_2	50	1	0	0	0	45.0077	6.8151	1360	SAMN11466134	E. Trucchi
50_3	50	1	0	0	0	45.0077	6.8151	1360	SAMN11466135	E. Trucchi
51_1	51	1	0	0	0	44.9985	6.92099	1641	SAMN11466139	E. Trucchi
51_2	51	1	0	0	0	44.9985	6.92099	1641	SAMN11466140	E. Trucchi
51_3	51	1	0	0	0	44.9985	6.92099	1641	SAMN11466141	E. Trucchi
6_1	6	1	1	1	0	42.3764	1.8088	1179	SAMN11466191	A. Hilpold, P. Schönswetter, M. Prahmsohler
6_2	6	1	0	0	0	42.3764	1.8088	1179	SAMN11466192	A. Hilpold, P. Schönswetter, M. Prahmsohler
6_3	6	1	1	1	1	42.3764	1.8088	1179	SAMN11466193	A. Hilpold, P. Schönswetter, M. Prahmsohler
76_1	76	1	0	0	0	45.6825	7.23721	1280	SAMN11466151	E. Trucchi
76_2	76	1	0	0	0	45.6825	7.23721	1280	SAMN11466152	E. Trucchi
76_3	76	1	0	0	0	45.6825	7.23721	1280	SAMN11466153	E. Trucchi
77_1	77	1	0	0	0	45.7596	7.4392	1357	SAMN11466162	E. Trucchi
77_2	77	1	0	0	0	45.7596	7.4392	1357	SAMN11466163	E. Trucchi
77_3	77	1	1	1	1	45.7596	7.4392	1357	SAMN11466164	E. Trucchi
78_1	78	1	0	0	0	45.7402	7.68391	1180	SAMN11466166	E. Trucchi
78_2	78	1	0	0	0	45.7402	7.68391	1180	SAMN11466167	E. Trucchi
78_3	78	1	0	0	0	45.7402	7.68391	1180	SAMN11466168	E. Trucchi
80_1	80	1	0	0	0	46.1676	7.23763	1040	SAMN11466157	E. Trucchi
80_2	80	1	0	0	0	46.1676	7.23763	1040	SAMN11466158	E. Trucchi
80_3	80	1	0	0	0	46.1676	7.23763	1040	SAMN11466159	E. Trucchi
84_1	84	1	0	0	0	46.17	7.44918	1453	SAMN11466148	E. Trucchi
84_2	84	1	0	0	0	46.17	7.44918	1453	SAMN11466149	E. Trucchi
84_3	84	1	0	0	0	46.17	7.44918	1453	SAMN11466150	E. Trucchi
89_1	89	1	0	0	0	46.2762	7.86455	1390	SAMN11466160	E. Trucchi
89_2	89	1	0	0	0	46.2762	7.86455	1390	SAMN11466161	E. Trucchi
89_3	89	1	0	0	0	46.2762	7.86455	1390	SAMN11466165	E. Trucchi
9_1	9	1	1	1	1	42.5004	2.4094	1709	SAMN11466200	A. Hilpold, P. Schönswetter, M. Prahmsohler
9_2	9	1	1	1	1	42.5004	2.4094	1709	SAMN11466201	A. Hilpold, P. Schönswetter, M. Prahmsohler
90_1	90	1	0	0	0	46.1285	8.94596	1221	SAMN11466143	E. Trucchi
90_2	90	1	0	0	0	46.1285	8.94596	1221	SAMN11466144	E. Trucchi
90_3	90	1	1	1	0	46.1285	8.94596	1221	SAMN11466145	E. Trucchi
94_1	94	1	1	1	1	46.6792	10.5598	1062	SAMN11466202	P. Kirschner & P. Schönswetter
94_2	94	1	1	1	1	46.6792	10.5598	1062	SAMN11466203	P. Kirschner & P. Schönswetter
94_3	94	1	0	0	0	46.6792	10.5598	1062	SAMN11466204	P. Kirschner & P. Schönswetter

## Sheet: Stipa capillata
Ind ID	Pop ID	STRUCTURE	bpp	Stairway Plot	CNN	Latitude	Longitude	Altitude	SRA accession number	Collector
100_1	100	1	0	0	1	46.633	10.724	1097	SAMN11479908	P. Kirschner
100_4	100	1	0	0	1	46.633	10.724	1097	SAMN11479906	P. Kirschner
100_5	100	1	1	0	1	46.633	10.724	1097	SAMN11479907	P. Kirschner
101_1	101	1	0	1	1	46.628	10.809	777	SAMN11479834	P. Schönswetter
101_2	101	1	1	1	1	46.628	10.809	777	SAMN11479835	P. Schönswetter
101_3	101	1	1	1	1	46.628	10.809	777	SAMN11479836	P. Schönswetter
108_1	108	1	0	1	1	46.834	10.377	1277	SAMN11479806	E. Trucchi
108_2	108	1	0	0	1	46.834	10.377	1277	SAMN11479805	E. Trucchi
108_5	108	1	1	1	1	46.834	10.377	1277	SAMN11479807	E. Trucchi
111_1	111	1	0	1	1	46.972	10.54	1000	SAMN11479787	P. Kirschner
111_2	111	1	0	1	1	46.972	10.54	1000	SAMN11479788	P. Kirschner
111_3	111	1	0	0	1	46.972	10.54	1000	SAMN11479789	P. Kirschner
115_1	115	1	0	0	1	47.116	10.627	1004	SAMN11479918	E. Falkeis
115_2	115	1	0	0	1	47.116	10.627	1004	SAMN11479919	E. Falkeis
115_3	115	1	0	0	1	47.116	10.627	1004	SAMN11479920	E. Falkeis
119_1	119	1	0	1	1	47.276	10.946	653	SAMN11479752	P. Schönswetter & M. Thalinger
119_2	119	1	0	0	1	47.276	10.946	653	SAMN11479753	P. Schönswetter & M. Thalinger
119_3	119	1	0	1	1	47.276	10.946	653	SAMN11479754	P. Schönswetter & M. Thalinger
12_1	12	1	0	0	1	42.207	3.02	10	SAMN11479937	A. Hilpold & M. Prahmsohler
12_2	12	1	0	0	1	42.207	3.02	10	SAMN11479938	A. Hilpold & M. Prahmsohler
12_3	12	1	0	0	1	42.207	3.02	10	SAMN11479939	A. Hilpold & M. Prahmsohler
122_1	122	1	0	0	1	47.195	11.414	852	SAMN11479749	P. Schönswetter
122_2	122	1	0	0	1	47.195	11.414	852	SAMN11479750	P. Schönswetter
122_4	122	1	1	0	1	47.195	11.414	852	SAMN11479751	P. Schönswetter
123_1	123	1	0	0	1	46.884	11.456	1047	SAMN11479778	P. Kirschner
123_2	123	1	0	0	1	46.884	11.456	1047	SAMN11479779	P. Kirschner
123_3	123	1	0	0	1	46.884	11.456	1047	SAMN11479780	P. Kirschner
125_1	125	1	0	0	1	46.662	11.602	767	SAMN11479784	P. Kirschner
125_2	125	1	0	0	1	46.662	11.602	767	SAMN11479785	P. Kirschner
125_3	125	1	0	0	1	46.662	11.602	767	SAMN11479786	P. Kirschner
128_1	128	1	0	0	1	46.276	11.433	880	SAMN11479775	B. Frajman & P. Schönswetter
128_2	128	1	0	0	1	46.276	11.433	880	SAMN11479776	B. Frajman & P. Schönswetter
128_3	128	1	0	0	1	46.276	11.433	880	SAMN11479777	B. Frajman & P. Schönswetter
131_1	131	1	0	0	1	45.942	11.085	467	SAMN11479772	B. Frajman & P. Schönswetter
131_2	131	1	0	0	1	45.942	11.085	467	SAMN11479773	B. Frajman & P. Schönswetter
131_3	131	1	0	0	1	45.942	11.085	467	SAMN11479774	B. Frajman & P. Schönswetter
152_1	152	1	1	0	1	42.768	13.135	820	SAMN11479931	A. Hilpold & Sanchez-Meseguer Andrea
152_2	152	1	1	0	1	42.768	13.135	820	SAMN11479932	A. Hilpold & Sanchez-Meseguer Andrea
152_3	152	1	0	0	1	42.768	13.135	820	SAMN11479933	A. Hilpold & Sanchez-Meseguer Andrea
157_1	157	1	0	1	1	42.316	13.557	839	SAMN11479758	P. Kirschner, B. Frajman
157_2	157	1	0	1	1	42.316	13.557	839	SAMN11479759	P. Kirschner, B. Frajman
157_3	157	1	0	0	1	42.316	13.557	839	SAMN11479760	P. Kirschner, B. Frajman
161_1	161	1	0	1	1	41.694	15.767	635	SAMN11479761	B. Frajman & P. Kirschner
161_2	161	1	0	1	1	41.694	15.767	635	SAMN11479762	B. Frajman & P. Kirschner
161_3	161	1	0	1	1	41.694	15.767	635	SAMN11479763	B. Frajman & P. Kirschner
162_1	162	1	0	0	1	48.106	7.684	321	SAMN11479728	B. Frajman & P. Kirschner
162_2	162	1	0	0	1	48.106	7.684	321	SAMN11479729	B. Frajman & P. Kirschner
162_3	162	1	0	0	1	48.106	7.684	321	SAMN11479730	B. Frajman & P. Kirschner
163_1	163	1	0	1	1	49.818	7.832	232	SAMN11479725	B. Frajman & P. Kirschner
163_2	163	1	0	1	1	49.818	7.832	232	SAMN11479726	B. Frajman & P. Kirschner
163_3	163	1	0	1	1	49.818	7.832	232	SAMN11479727	B. Frajman & P. Kirschner
168_1	168	1	1	1	1	49.87	9.862	291	SAMN11479742	E. Zaveska
168_2	168	1	0	1	1	49.87	9.862	291	SAMN11479743	E. Zaveska
168_3	168	1	0	1	1	49.87	9.862	291	SAMN11479744	E. Zaveska
176_1	176	1	0	0	1	51.228	11.709	180	SAMN11479921	T. Wilhalm & E. Zippel
176_3	176	1	0	0	1	51.228	11.709	180	SAMN11479922	T. Wilhalm & E. Zippel
180_1	180	1	0	0	1	51.672	11.742	73	SAMN11479706	E.Zaveska
180_2	180	1	0	0	1	51.672	11.742	73	SAMN11479707	E.Zaveska
180_3	180	1	0	0	1	51.672	11.742	73	SAMN11479708	E.Zaveska
181_1	181	1	0	0	1	52.435	12.779	42	SAMN11479703	E.Zaveska
181_2	181	1	0	0	1	52.435	12.779	42	SAMN11479704	E.Zaveska
181_3	181	1	0	0	1	52.435	12.779	42	SAMN11479705	E.Zaveska
182_1	182	1	0	0	1	52.982	14.107	28	SAMN11479748	T. Wilhalm, E. Zippel
183_1	183	1	0	1	1	52.465	14.497	27	SAMN11479697	E.Zaveska
183_2	183	1	0	0	1	52.465	14.497	27	SAMN11479698	E.Zaveska
183_3	183	1	0	0	1	52.465	14.497	27	SAMN11479699	E.Zaveska
186_1	186	1	0	0	1	50.226	14.269	212	SAMN11479851	E. Zaveska
186_2	186	1	0	0	1	50.226	14.269	212	SAMN11479852	E. Zaveska
186_3	186	1	0	0	1	50.226	14.269	212	SAMN11479853	E. Zaveska
190_1	190	1	1	1	1	48.416	15.589	345	SAMN11479943	Pachschwöll Clemens
190_2	190	1	1	0	1	48.416	15.589	345	SAMN11479944	Pachschwöll Clemens
190_3	190	1	0	0	1	48.416	15.589	345	SAMN11479945	Pachschwöll Clemens
195_1	195	1	0	0	1	49.109	16.186	374	SAMN11479903	P. Kirschner
195_2	195	1	1	0	1	49.109	16.186	374	SAMN11479904	P. Kirschner
195_3	195	1	0	0	1	49.109	16.186	374	SAMN11479905	P. Kirschner
20_2	20	1	0	0	1	43.568	4.829	10	SAMN11479731	A. Hilpold, P. Schönswetter, M. Prahmsohler
20_3	20	1	0	0	1	43.568	4.829	10	SAMN11479732	A. Hilpold, P. Schönswetter, M. Prahmsohler
201_1	201	1	0	1	1	48.2	16.974	201	SAMN11479739	M. Slovak
201_2	201	1	0	1	1	48.2	16.974	201	SAMN11479740	M. Slovak
201_3	201	1	0	1	1	48.2	16.974	201	SAMN11479741	M. Slovak
210_1	210	1	0	0	1	47.777	16.584	190	SAMN11479915	P. Kirschner
210_2	210	1	0	0	1	47.777	16.584	190	SAMN11479916	P. Kirschner
210_3	210	1	0	0	1	47.777	16.584	190	SAMN11479917	P. Kirschner
212_1	212	1	0	0	1	47.711	17.677	113	SAMN11479883	P. Kirschner
212_2	212	1	0	0	1	47.711	17.677	113	SAMN11479884	P. Kirschner
212_3	212	1	0	0	1	47.711	17.677	113	SAMN11479885	P. Kirschner
215_1	215	1	0	0	1	46.966	17.863	218	SAMN11479892	P. Kirschner
215_2	215	1	1	0	1	46.966	17.863	218	SAMN11479893	P. Kirschner
215_3	215	1	0	0	1	46.966	17.863	218	SAMN11479894	P. Kirschner
217_1	217	1	0	0	1	45.882	18.244	205	SAMN11479764	B. Frajman & P. Schönswetter
217_2	217	1	1	0	1	45.882	18.244	205	SAMN11479765	B. Frajman & P. Schönswetter
218_1	218	1	1	1	1	47.768	18.522	109	SAMN11479854	E. Zaveska
218_2	218	1	1	0	1	47.768	18.522	109	SAMN11479855	E. Zaveska
218_3	218	1	0	1	1	47.768	18.522	109	SAMN11479856	E. Zaveska
224_1	224	1	0	0	1	46.883	19.401	105	SAMN11479895	P. Kirschner
224_2	224	1	0	0	1	46.883	19.401	105	SAMN11479896	P. Kirschner
224_3	224	1	0	0	1	46.883	19.401	105	SAMN11479897	P. Kirschner
225_1	225	1	0	0	1	47.789	19.966	269	SAMN11479889	P. Kirschner
225_2	225	1	1	0	1	47.789	19.966	269	SAMN11479890	P. Kirschner
225_3	225	1	0	0	1	47.789	19.966	269	SAMN11479891	P. Kirschner
229_1	229	1	0	0	1	48.125	21.352	132	SAMN11479880	P. Kirschner
229_2	229	1	0	0	1	48.125	21.352	132	SAMN11479881	P. Kirschner
229_3	229	1	0	0	1	48.125	21.352	132	SAMN11479882	P. Kirschner
234_1	234	1	0	0	1	46.564	23.969	479	SAMN11479877	P. Kirschner
234_2	234	1	0	0	1	46.564	23.969	479	SAMN11479878	P. Kirschner
234_3	234	1	0	0	1	46.564	23.969	479	SAMN11479879	P. Kirschner
237_1	237	1	0	0	1	45.824	24.184	458	SAMN11479857	E. Zaveska
237_2	237	1	0	0	1	45.824	24.184	458	SAMN11479858	E. Zaveska
237_3	237	1	0	0	1	45.824	24.184	458	SAMN11479859	E. Zaveska
239_1	239	1	0	0	1	45.104	19.631	187	SAMN11479898	P. Kirschner
239_2	239	1	0	0	1	45.104	19.631	187	SAMN11479899	P. Kirschner
239_3	239	1	0	0	1	45.104	19.631	187	SAMN11479900	P. Kirschner
243_1	243	1	0	0	1	44.864	21.06	135	SAMN11479901	P. Kirschner
243_2	243	1	0	0	1	44.864	21.06	135	SAMN11479902	P. Kirschner
247_1	247	1	1	0	1	43.461	20.669	369	SAMN11479923	B. Frajman & P. Schönswetter
247_2	247	1	1	0	1	43.461	20.669	369	SAMN11479924	B. Frajman & P. Schönswetter
247_3	247	1	0	0	1	43.461	20.669	369	SAMN11479925	B. Frajman & P. Schönswetter
254_1	254	1	0	1	1	40.795	21.734	594	SAMN11479860	P. Kirschner
254_2	254	1	0	1	1	40.795	21.734	594	SAMN11479861	P. Kirschner
257_1	257	1	1	0	1	41.532	23.434	544	SAMN11479862	P. Kirschner
257_2	257	1	0	0	1	41.532	23.434	544	SAMN11479863	P. Kirschner
257_3	257	1	0	0	1	41.532	23.434	544	SAMN11479864	P. Kirschner
261_1	261	1	1	1	1	53.327	18.383	80	SAMN11479745	E.Zaveska, F. Kolar
261_2	261	1	0	0	1	53.327	18.383	80	SAMN11479746	E.Zaveska, F. Kolar
261_3	261	1	0	0	1	53.327	18.383	80	SAMN11479747	E.Zaveska, F. Kolar
263_1	263	1	0	0	1	50.447	20.756		SAMN11479790	E. Klichowska
263_2	263	1	0	1	1	50.447	20.756		SAMN11479791	E. Klichowska
263_3	263	1	0	1	1	50.447	20.756		SAMN11479792	E. Klichowska
267_1	267	1	0	0	0	49.396	26.083	376	SAMN11479709	E.Zaveska, P. Kirschner
267_2	267	1	0	0	0	49.396	26.083	376	SAMN11479710	E.Zaveska, P. Kirschner
267_3	267	1	0	0	0	49.396	26.083	376	SAMN11479711	E.Zaveska, P. Kirschner
269_1	269	1	0	0	0	48.475	27.805	196	SAMN11479712	P. Kirschner & E. Zaveska
269_2	269	1	0	0	0	48.475	27.805	196	SAMN11479713	P. Kirschner & E. Zaveska
269_3	269	1	0	0	0	48.475	27.805	196	SAMN11479714	P. Kirschner & E. Zaveska
273_1	273	1	0	0	0	47.193	27.47	115	SAMN11479940	L. Ekrt
273_2	273	1	0	0	0	47.193	27.47	115	SAMN11479941	L. Ekrt
273_3	273	1	0	0	0	47.193	27.47	115	SAMN11479942	L. Ekrt
277_1	277	1	0	0	0	46.767	29.253	123	SAMN11479715	P. Kirschner & E. Zaveska
277_2	277	1	0	1	0	46.767	29.253	123	SAMN11479716	P. Kirschner & E. Zaveska
277_3	277	1	0	0	0	46.767	29.253	123	SAMN11479717	P. Kirschner & E. Zaveska
279_1	279	1	0	0	0	46.763	31.127	50	SAMN11479718	B. Frajman & P. Schönswetter
279_2	279	1	0	0	0	46.763	31.127	50	SAMN11479719	B. Frajman & P. Schönswetter
279_3	279	1	0	1	0	46.763	31.127	50	SAMN11479720	B. Frajman & P. Schönswetter
280_1	280	1	0	0	0	45.895	27.84	190	SAMN11479874	P. Kirschner
280_2	280	1	0	0	0	45.895	27.84	190	SAMN11479875	P. Kirschner
280_3	280	1	0	0	0	45.895	27.84	190	SAMN11479876	P. Kirschner
284_1	284	1	0	0	0	44.168	28.409	21	SAMN11479871	P. Kirschner
284_2	284	1	0	0	0	44.168	28.409	21	SAMN11479872	P. Kirschner
284_3	284	1	0	0	0	44.168	28.409	21	SAMN11479873	P. Kirschner
287_1	287	1	0	0	1	42.714	27.892	134	SAMN11479868	P. Kirschner
287_2	287	1	0	0	1	42.714	27.892	134	SAMN11479869	P. Kirschner
287_3	287	1	0	0	1	42.714	27.892	134	SAMN11479870	P. Kirschner
288_1	288	1	0	0	0	40.222	39.748	1680	SAMN11479814	B. Frajman, Ch. Gilli, M. Falch & P. Schönswetter
288_4	288	1	0	0	0	40.222	39.748	1680	SAMN11479815	B. Frajman, Ch. Gilli, M. Falch & P. Schönswetter
289_1	289	1	0	0	0	40.159	41.024	2050	SAMN11479811	B. Frajman, Ch. Gilli, M. Falch & P. Schönswetter
289_2	289	1	0	0	0	40.159	41.024	2050	SAMN11479812	B. Frajman, Ch. Gilli, M. Falch & P. Schönswetter
289_3	289	1	0	0	0	40.159	41.024	2050	SAMN11479813	B. Frajman, Ch. Gilli, M. Falch & P. Schönswetter
29_1	29	1	0	0	1	44.61	6.53	930	SAMN11479736	A. Hilpold, P. Schönswetter, M. Prahmsohler
29_2	29	1	0	1	1	44.61	6.53	930	SAMN11479737	A. Hilpold, P. Schönswetter, M. Prahmsohler
29_3	29	1	0	0	1	44.61	6.53	930	SAMN11479738	A. Hilpold, P. Schönswetter, M. Prahmsohler
293_1	293	1	0	0	0	41.849	44.632	505	SAMN11479692	P. Schönswetter & B. Frajman
293_2	293	1	0	0	0	41.849	44.632	505	SAMN11479693	P. Schönswetter & B. Frajman
297_1	297	1	0	0	0	41.496	45.291	644	SAMN11479724	P. Kirschner
30_1	30	1	1	0	1	44.621	6.544	874	SAMN11479802	E. Trucchi
30_2	30	1	0	0	1	44.621	6.544	874	SAMN11479803	E. Trucchi
30_3	30	1	0	0	1	44.621	6.544	874	SAMN11479804	E. Trucchi
301_1	301	1	0	0	0	40.456	45.328	1961	SAMN11479687	P. Schönswetter & B. Frajman
301_2	301	1	0	0	0	40.456	45.328	1961	SAMN11479688	P. Schönswetter & B. Frajman
301_3	301	1	0	0	0	40.456	45.328	1961	SAMN11479689	P. Schönswetter & B. Frajman
302_1	302	1	0	0	0	39.42	43.982	2195	SAMN11479808	B. Frajman, Ch. Gilli, M. Falch & P. Schönswetter
302_2	302	1	0	0	0	39.42	43.982	2195	SAMN11479809	B. Frajman, Ch. Gilli, M. Falch & P. Schönswetter
302_3	302	1	0	1	0	39.42	43.982	2195	SAMN11479810	B. Frajman, Ch. Gilli, M. Falch & P. Schönswetter
303_1	303	1	0	0	0	39.642	45.298	2256	SAMN11479690	P. Schönswetter & B. Frajman
303_2	303	1	0	0	0	39.642	45.298	2256	SAMN11479691	P. Schönswetter & B. Frajman
306_1	306	1	0	1	0	39.021	46.285	2150	SAMN11479694	L. Ekrt
306_2	306	1	0	1	0	39.021	46.285	2150	SAMN11479695	L. Ekrt
306_3	306	1	0	1	0	39.021	46.285	2150	SAMN11479696	L. Ekrt
309_1	309	1	0	0	0	50.339	57.265	260	SAMN11479819	A. Hilpold
309_2	309	1	0	0	0	50.339	57.265	260	SAMN11479820	A. Hilpold
309_3	309	1	0	0	0	50.339	57.265	260	SAMN11479821	A. Hilpold
311_1	311	1	0	1	0	50.64	57.779	306	SAMN11479825	A. Hilpold
311_2	311	1	0	0	0	50.64	57.779	306	SAMN11479826	A. Hilpold
311_3	311	1	0	1	0	50.64	57.779	306	SAMN11479827	A. Hilpold
312_1	312	1	0	1	0	42.179	72.777	1643	SAMN11479843	B. Erschbamer
312_2	312	1	0	1	0	42.179	72.777	1643	SAMN11479844	B. Erschbamer
313_1	313	1	0	1	0	42.568	74.476	2224	SAMN11479845	B. Erschbamer
313_2	313	1	0	1	0	42.568	74.476	2224	SAMN11479846	B. Erschbamer
313_3	313	1	0	1	0	42.568	74.476	2224	SAMN11479847	B. Erschbamer
314_1	314	1	0	1	0	43.838	75.431	976	SAMN11479837	B. Frajman & P. Schönswetter
314_2	314	1	0	1	0	43.838	75.431	976	SAMN11479838	B. Frajman & P. Schönswetter
314_3	314	1	0	0	0	43.838	75.431	976	SAMN11479839	B. Frajman & P. Schönswetter
315_1	315	1	0	0	0	41.335	76.058	2675	SAMN11479840	B. Erschbamer
315_2	315	1	0	0	0	41.335	76.058	2675	SAMN11479841	B. Erschbamer
315_3	315	1	0	0	0	41.335	76.058	2675	SAMN11479842	B. Erschbamer
316_1	316	1	0	0	0	44.221	77.705	945	SAMN11479816	A. Hilpold
316_2	316	1	0	0	0	44.221	77.705	945	SAMN11479817	A. Hilpold
316_3	316	1	0	1	0	44.221	77.705	945	SAMN11479818	A. Hilpold
38_1	38	1	0	1	1	44.787	6.874	1663	SAMN11479831	P. Schönswetter
38_2	38	1	0	0	1	44.787	6.874	1663	SAMN11479832	P. Schönswetter
38_3	38	1	0	1	1	44.787	6.874	1663	SAMN11479833	P. Schönswetter
43_1	43	1	0	0	1	44.864	6.589	1260	SAMN11479796	E. Trucchi
43_2	43	1	0	0	1	44.864	6.589	1260	SAMN11479797	E. Trucchi
43_3	43	1	0	1	1	44.864	6.589	1260	SAMN11479798	E. Trucchi
49_1	49	1	0	0	1	45.043	6.827	1090	SAMN11479927	E. Trucchi
49_2	49	1	0	0	1	45.043	6.827	1090	SAMN11479928	E. Trucchi
49_4	49	1	0	0	1	45.043	6.827	1090	SAMN11479926	E. Trucchi
50_3	50	1	0	0	1	45.008	6.815	1360	SAMN11479934	E. Trucchi
50_5	50	1	0	0	1	45.008	6.815	1360	SAMN11479935	E. Trucchi
50_6	50	1	1	0	1	45.008	6.815	1360	SAMN11479936	E. Trucchi
54_1	54	1	0	0	1	45.151	7.09	1217	SAMN11479909	E. Trucchi
54_2	54	1	0	0	1	45.151	7.09	1217	SAMN11479910	E. Trucchi
54_3	54	1	0	0	1	45.151	7.09	1217	SAMN11479911	E. Trucchi
55_1	55	1	0	1	1	45.145	7.122	520	SAMN11479828	P. Schönswetter
55_2	55	1	0	0	1	45.145	7.122	520	SAMN11479829	P. Schönswetter
55_3	55	1	1	1	1	45.145	7.122	520	SAMN11479830	P. Schönswetter
57_1	57	1	0	0	1	45.281	6.823	1399	SAMN11479793	E. Trucchi
57_2	57	1	0	1	1	45.281	6.823	1399	SAMN11479794	E. Trucchi
57_3	57	1	0	0	1	45.281	6.823	1399	SAMN11479795	E. Trucchi
64_1	64	1	0	0	1	45.232	6.458	798	SAMN11479700	E. Trucchi
64_2	64	1	0	0	1	45.232	6.458	798	SAMN11479701	E. Trucchi
64_3	64	1	0	0	1	45.232	6.458	798	SAMN11479702	E. Trucchi
65_1	65	1	1	0	1	45.307	6.357	748	SAMN11479781	E. Trucchi
65_2	65	1	0	0	1	45.307	6.357	748	SAMN11479782	E. Trucchi
65_3	65	1	0	0	1	45.307	6.357	748	SAMN11479783	E. Trucchi
66_1	66	1	0	0	1	45.556	6.631	768	SAMN11479721	E. Trucchi
66_2	66	1	0	0	1	45.556	6.631	768	SAMN11479722	E. Trucchi
66_3	66	1	1	0	1	45.556	6.631	768	SAMN11479723	E. Trucchi
67_1	67	1	0	1	1	45.574	6.715	915	SAMN11479756	E. Trucchi
67_3	67	1	0	0	1	45.574	6.715	915	SAMN11479757	E. Trucchi
67_4	67	1	0	0	1	45.574	6.715	915	SAMN11479755	E. Trucchi
7_1	7	1	0	0	0	42.376	1.814	1050	SAMN11479929	A. Hilpold & T. Wilhalm
7_2	7	1	0	0	0	42.376	1.814	1050	SAMN11479930	A. Hilpold & T. Wilhalm
70_1	70	1	0	0	1	45.623	6.759	932	SAMN11479733	E. Trucchi
70_2	70	1	0	0	1	45.623	6.759	932	SAMN11479734	E. Trucchi
70_3	70	1	0	0	1	45.623	6.759	932	SAMN11479735	E. Trucchi
71_1	71	1	1	0	1	45.766	7.024	1071	SAMN11479848	E. Trucchi
71_2	71	1	0	0	1	45.766	7.024	1071	SAMN11479849	E. Trucchi
71_3	71	1	0	1	1	45.766	7.024	1071	SAMN11479850	E. Trucchi
75_1	75	1	0	1	1	45.7	7.226	761	SAMN11479867	E. Trucchi
75_3	75	1	0	0	1	45.7	7.226	761	SAMN11479865	E. Trucchi
75_4	75	1	0	0	1	45.7	7.226	761	SAMN11479866	E. Trucchi
77_1	77	1	0	0	1	45.76	7.439	1357	SAMN11479887	E. Trucchi
77_2	77	1	0	1	1	45.76	7.439	1357	SAMN11479886	E. Trucchi
77_3	77	1	0	1	1	45.76	7.439	1357	SAMN11479888	E. Trucchi
80_1	80	1	0	0	1	46.168	7.238	1040	SAMN11479799	E. Trucchi
80_2	80	1	1	0	1	46.168	7.238	1040	SAMN11479800	E. Trucchi
80_3	80	1	0	0	1	46.168	7.238	1040	SAMN11479801	E. Trucchi
81_1	81	1	0	1	1	46.236	7.364	589	SAMN11479822	E. Trucchi
81_4	81	1	1	0	1	46.236	7.364	589	SAMN11479823	E. Trucchi
81_5	81	1	0	0	1	46.236	7.364	589	SAMN11479824	E. Trucchi
88_1	88	1	0	0	1	46.31	7.81	744	SAMN11479684	E. Trucchi
88_2	88	1	0	0	1	46.31	7.81	744	SAMN11479685	E. Trucchi
88_3	88	1	0	0	1	46.31	7.81	744	SAMN11479686	E. Trucchi
91_1	91	1	0	0	1	46.165	10.091	397	SAMN11479769	B. Frajman & P. Schönswetter
91_2	91	1	1	0	1	46.165	10.091	397	SAMN11479770	B. Frajman & P. Schönswetter
91_3	91	1	0	0	1	46.165	10.091	397	SAMN11479771	B. Frajman & P. Schönswetter
92_1	92	1	1	0	1	46.679	10.56	1059	SAMN11479912	P. Kirschner
92_2	92	1	0	0	1	46.679	10.56	1059	SAMN11479913	P. Kirschner
92_3	92	1	0	0	1	46.679	10.56	1059	SAMN11479914	P. Kirschner
93_1	93	1	0	1	1	46.178	10.318	717	SAMN11479766	B. Frajman & P. Schönswetter
93_2	93	1	0	0	1	46.178	10.318	717	SAMN11479767	B. Frajman & P. Schönswetter
93_3	93	1	0	1	1	46.178	10.318	717	SAMN11479768	B. Frajman & P. Schönswetter
